# Supplementary material
Source: Springer Nature journal article supplement (https://www.springermedizin.de/resource/supplementary/12943_2011_949_MOESM13_ESM.pdf/9551742)

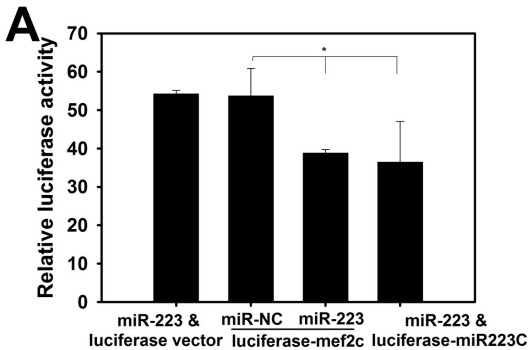

**B**

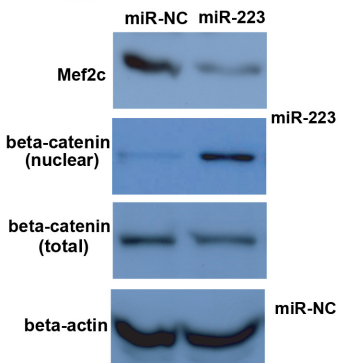

**C**

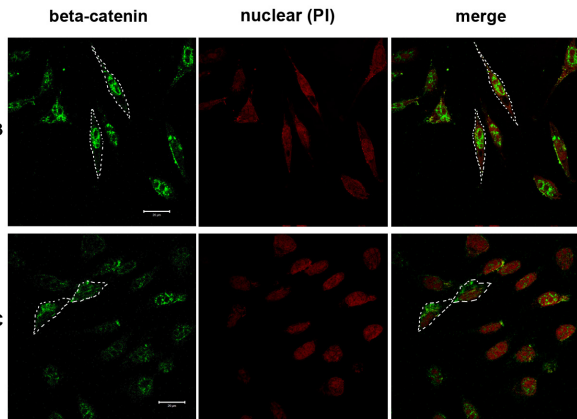

Supplement: MOESM13 [file 9551742]
